# Supplementary material for: Inferring intra-motif dependencies of DNA binding sites from ChIP-seq data
Source: Springer Nature journal article supplement (doi:10.1186/s12859-015-0797-4), 2015-11-09

# 1 Evidence for (at least) one motif

## ATF2 (1193 ChIP-Seq positives)

PWM

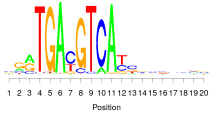

PMM1

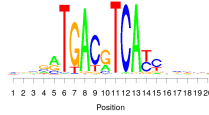

PMM2

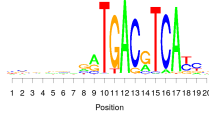

PMM3

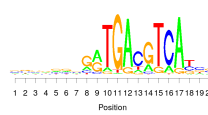

PMM4

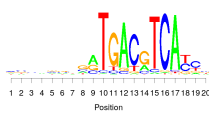

## ATF3 (962 ChIP-Seq positives)

PWM

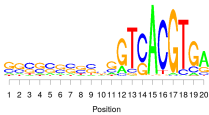

PMM1

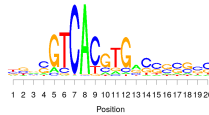

PMM2

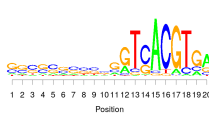

PMM3

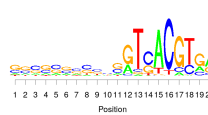

PMM4

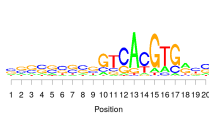

## BACH1 (2292 ChIP-Seq positives)

PWM

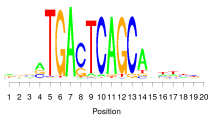

PMM1

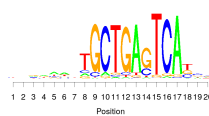

PMM2

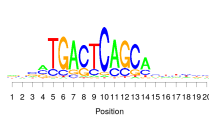

PMM3

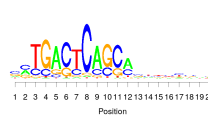

PMM4

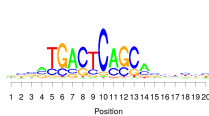

## BCL11A (504 ChIP-Seq positives)

PWM

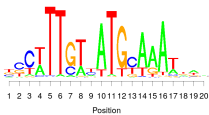

PMM1

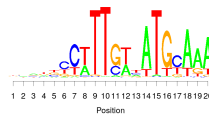

PMM2

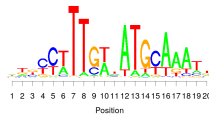

PMM3

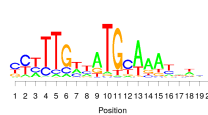

PMM4

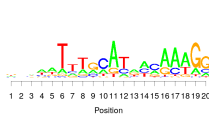

**BRCA1 (405 ChIP-Seq positives)**

PWM

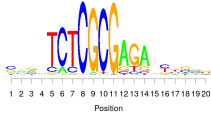

PMM1

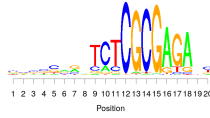

PMM2

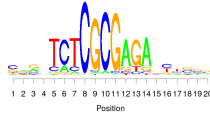

PMM3

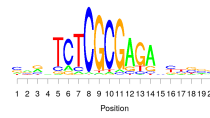

PMM4

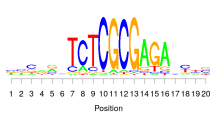

**CEBPB (3112 ChIP-Seq positives)**

PWM

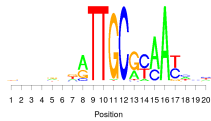

PMM1

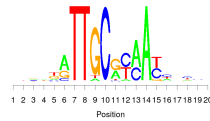

PMM2

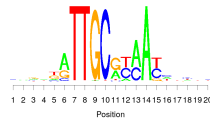

PMM3

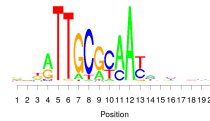

PMM4

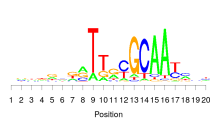

**CHD2 (1368 ChIP-Seq positives)**

PWM

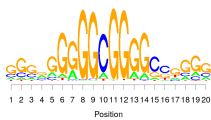

PMM1

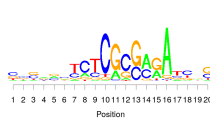

PMM2

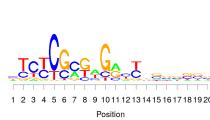

PMM3

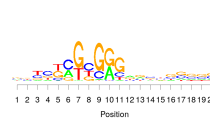

PMM4

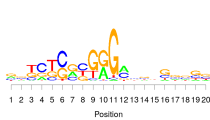

**CTCF (10822 ChIP-Seq positives)**

PWM

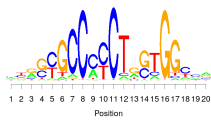

PMM1

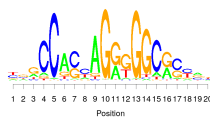

PMM2

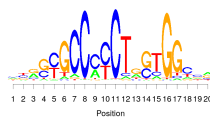

PMM3

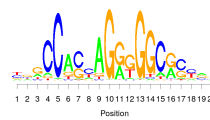

PMM4

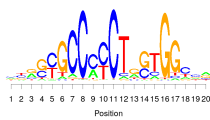

**EGR1 (1749 ChIP-Seq positives)**

PWM

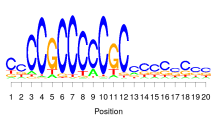

PMM1

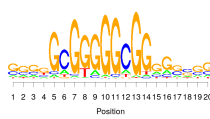

PMM2

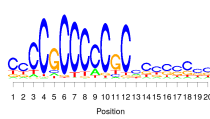

PMM3

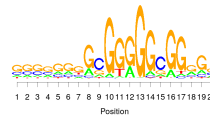

PMM4

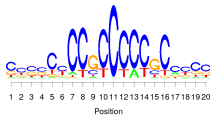



**MAFK (2284 ChIP-Seq positives)**

**PWM**

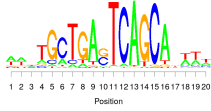

**PMM1**

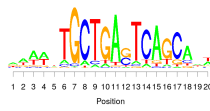

**PMM2**

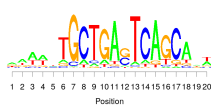

**PMM3**

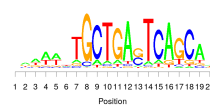

**PMM4**

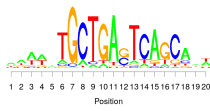

**MAX (2225 ChIP-Seq positives)**

**PWM**

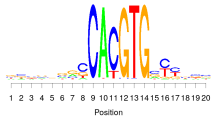

**PMM1**

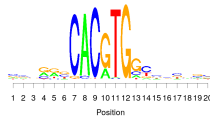

**PMM2**

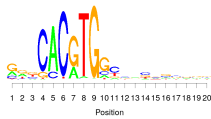

**PMM3**

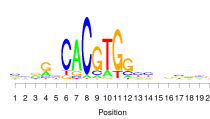

**PMM4**

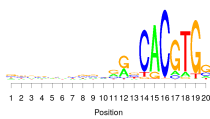

**MXI1 (1271 ChIP-Seq positives)**

**PWM**

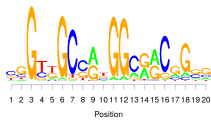

**PMM1**

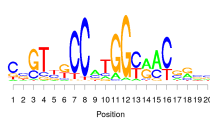

**PMM2**

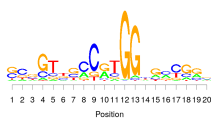

**PMM3**

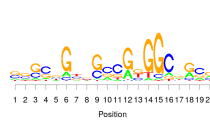

**PMM4**

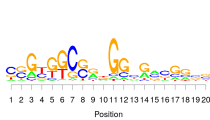

**NANOG (1095 ChIP-Seq positives)**

**PWM**

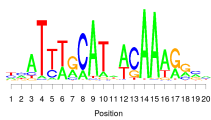

**PMM1**

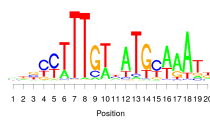

**PMM2**

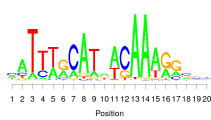

**PMM3**

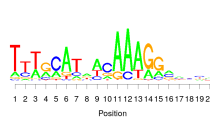

**PMM4**

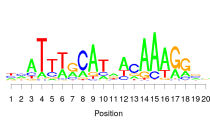

**NRF1 (903 ChIP-Seq positives)**

**PWM**

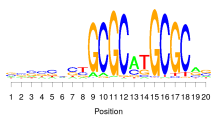

**PMM1**

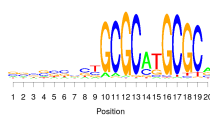

**PMM2**

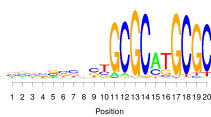

**PMM3**

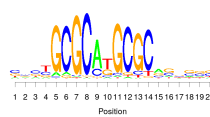

**PMM4**

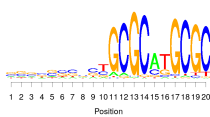

**POU5F1 (800 ChIP-Seq positives)**

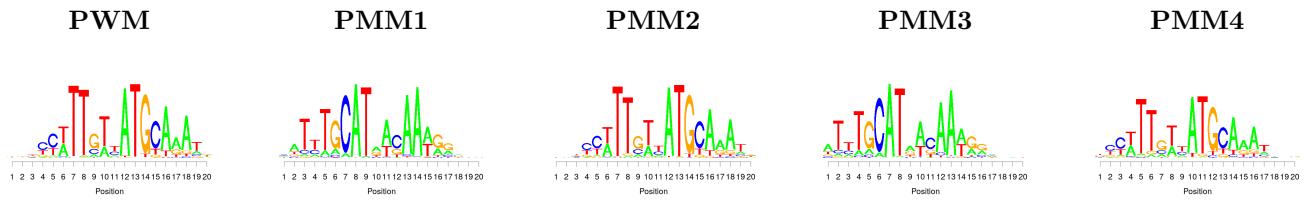

**RAD21 (15136 ChIP-Seq positives)**

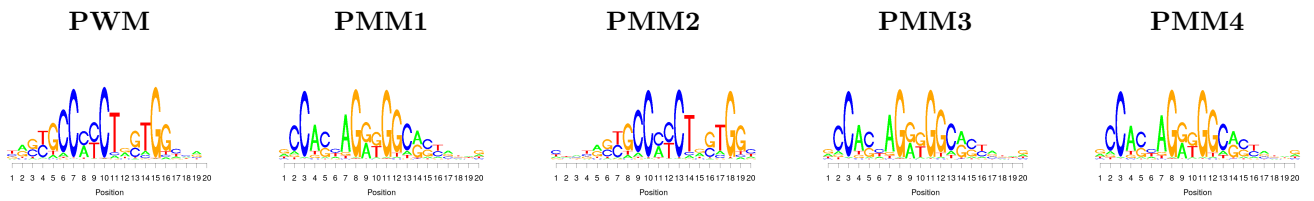

**REST (2656 ChIP-Seq positives)**

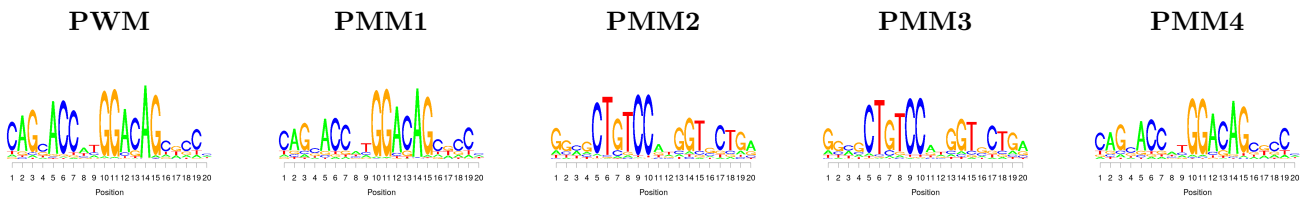

**RFX5 (338 ChIP-Seq positives)**

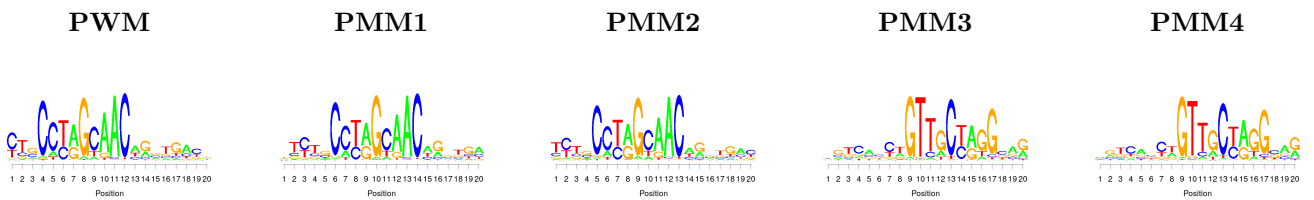

**RXRA (262 ChIP-Seq positives)**

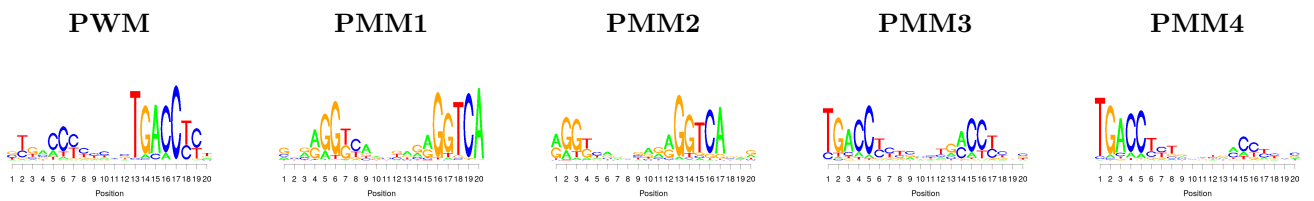

**SIN3AK20 (4260 ChIP-Seq positives)**

**PWM**

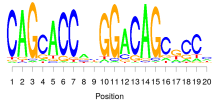

**PMM1**

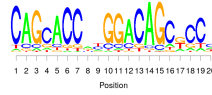

**PMM2**

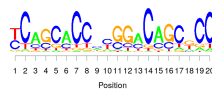

**PMM3**

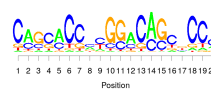

**PMM4**

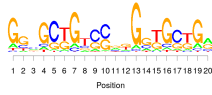

**SIX5 (684 ChIP-Seq positives)**

**PWM**

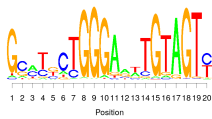

**PMM1**

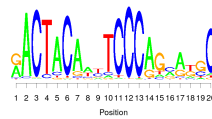

**PMM2**

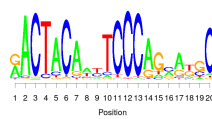

**PMM3**

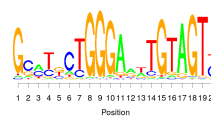

**PMM4**

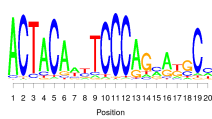

**SP1 (3009 ChIP-Seq positives)**

**PWM**

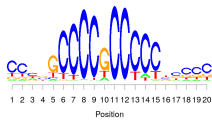

**PMM1**

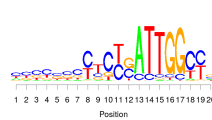

**PMM2**

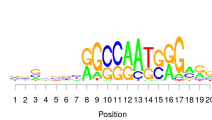

**PMM3**

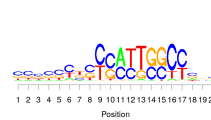

**PMM4**

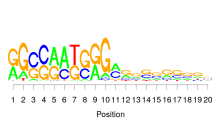

**SP2 (492 ChIP-Seq positives)**

**PWM**

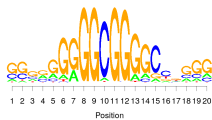

**PMM1**

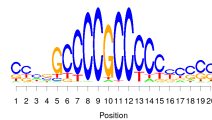

**PMM2**

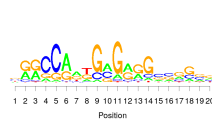

**PMM3**

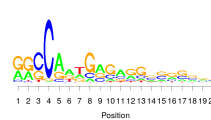

**PMM4**

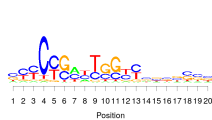

**SP4 (1150 ChIP-Seq positives)**

**PWM**

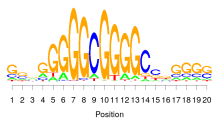

**PMM1**

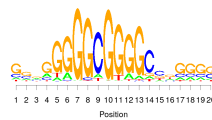

**PMM2**

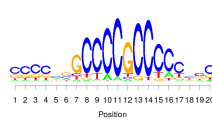

**PMM3**

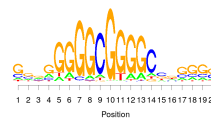

**PMM4**

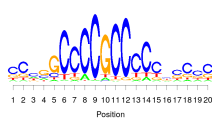

**SRF (1020 ChIP-Seq positives)**

**PWM**

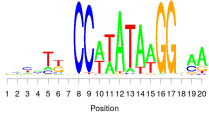

**PMM1**

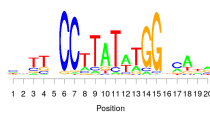

**PMM2**

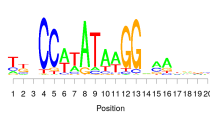

**PMM3**

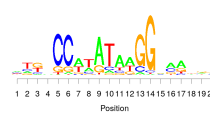

**PMM4**

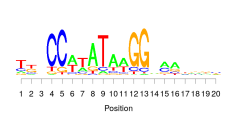

**TCF12 (1567 ChIP-Seq positives)**

**PWM**

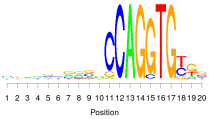

**PMM1**

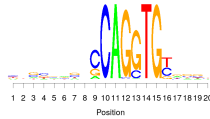

**PMM2**

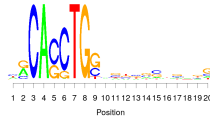

**PMM3**

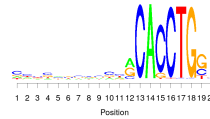

**PMM4**

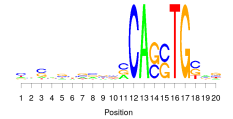

**TEAD4 (3972 ChIP-Seq positives)**

**PWM**

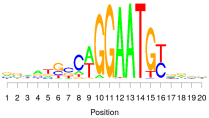

**PMM1**

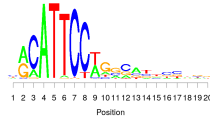

**PMM2**

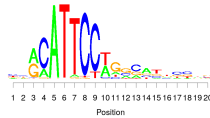

**PMM3**

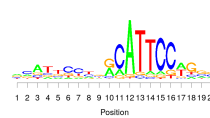

**PMM4**

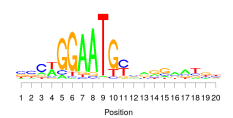

**USF1 (5208 ChIP-Seq positives)**

**PWM**

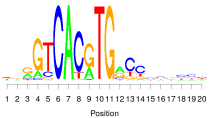

**PMM1**

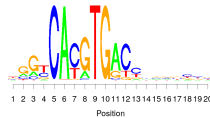

**PMM2**

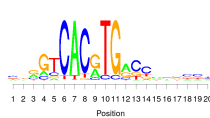

**PMM3**

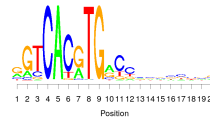

**PMM4**

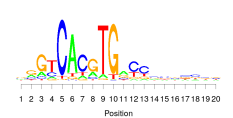

**USF2 (1391 ChIP-Seq positives)**

**PWM**

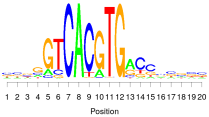

**PMM1**

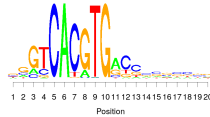

**PMM2**

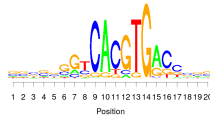

**PMM3**

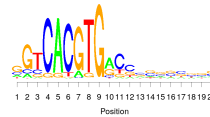

**PMM4**

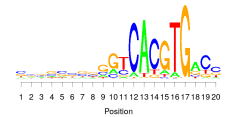

### YY1 (3646 ChIP-Seq positives)

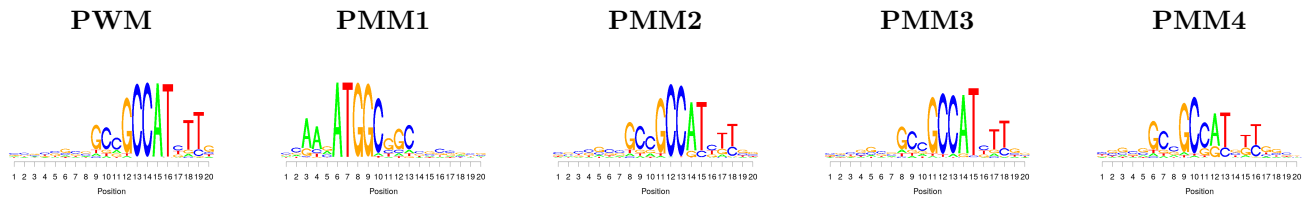

### ZNF143 (6134 ChIP-Seq positives)

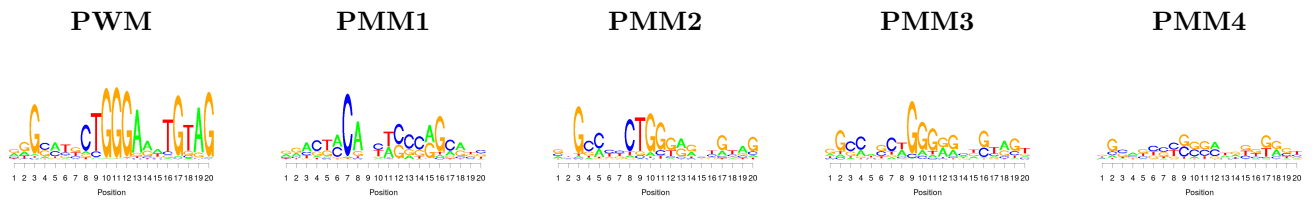

## 2 No meaningful motif identified

### CHD1 (1380 ChIP-Seq positives)

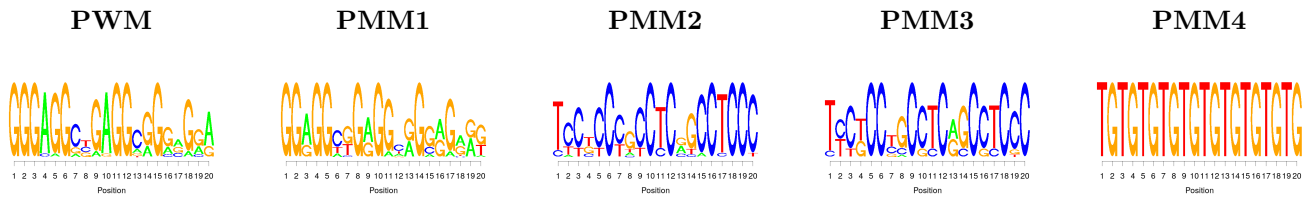

### CTBP2 (1418 ChIP-Seq positives)

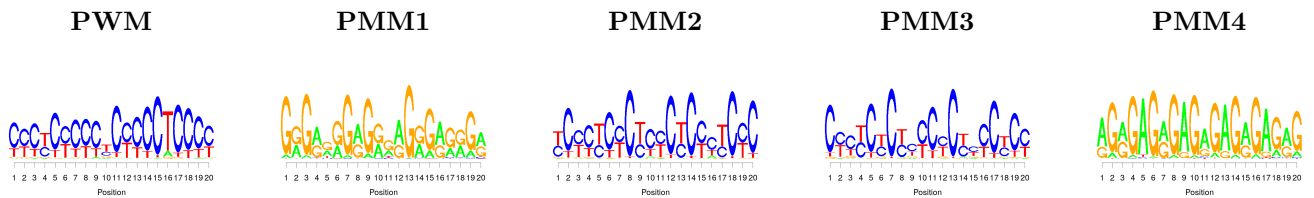







**TAF7 (2072 ChIP-Seq positives)**

**PWM**

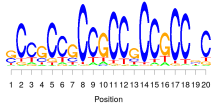

**PMM1**

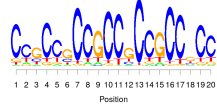

**PMM2**

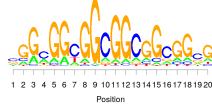

**PMM3**

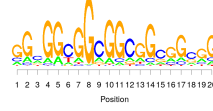

**PMM4**

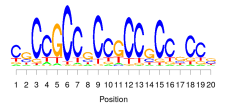

**TBP (3429 ChIP-Seq positives)**

**PWM**

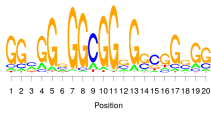

**PMM1**

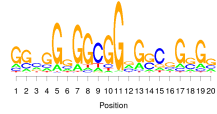

**PMM2**

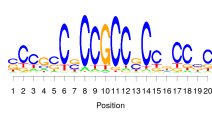

**PMM3**

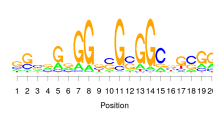

**PMM4**

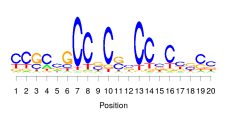

Supplement: 12859_2015_797_MOESM1_ESM.pdf [file 12859_2015_797_MOESM1_ESM.pdf]
