# Supplementary material for: Inferring intra-motif dependencies of DNA binding sites from ChIP-seq data
Source: Springer Nature journal article supplement (doi:10.1186/s12859-015-0797-4), 2015-11-09

Jenson-Shannon divergence

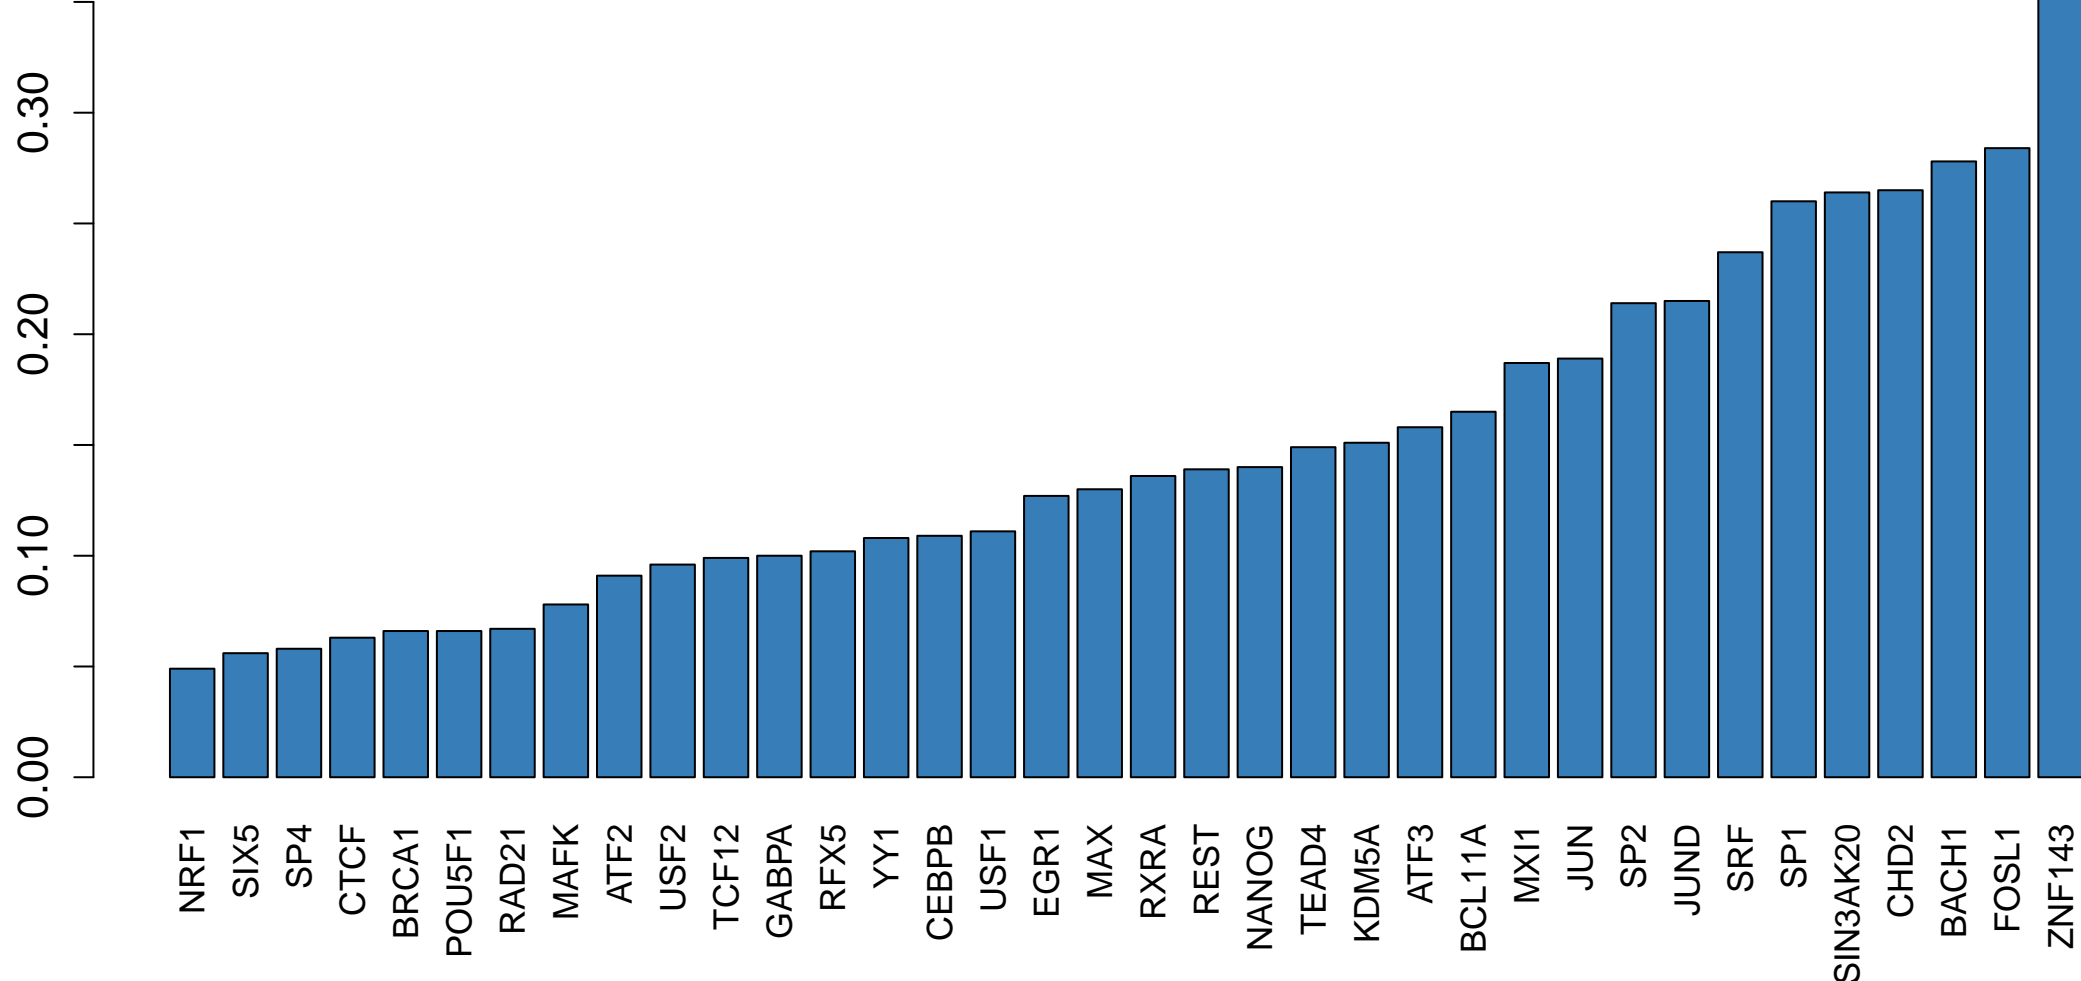

Supplement: 12859_2015_797_MOESM2_ESM.pdf [file 12859_2015_797_MOESM2_ESM.pdf]
