# Supplementary material for: Inferring intra-motif dependencies of DNA binding sites from ChIP-seq data
Source: Springer Nature journal article supplement (doi:10.1186/s12859-015-0797-4), 2015-11-09
Supplement: 12859_2015_797_MOESM3_ESM.pdf [file 12859_2015_797_MOESM3_ESM.pdf]

|               |                 |                 |                 |                 |
|---------------|-----------------|-----------------|-----------------|-----------------|
| all data sets | PMM1            | PMM2            | PMM3            | PMM4            |
| PWM           | <b>9.60E-10</b> | <b>2.91E-10</b> | <b>1.25E-09</b> | <b>9.60E-10</b> |
| PMM1          |                 | <b>2.33E-05</b> | <b>6.25E-04</b> | <b>1.36E-03</b> |
| PMM2          |                 |                 | 8.71E-01        | 8.82E-01        |
| PMM3          |                 |                 |                 | 8.82E-01        |
| Category A    | PMM1            | PMM2            | PMM3            | PMM4            |
| PWM           | <b>1.13E-06</b> | <b>5.96E-07</b> | <b>2.53E-06</b> | <b>1.97E-06</b> |
| PMM1          |                 | <b>7.37E-03</b> | 5.87E-02        | 9.57E-02        |
| PMM2          |                 |                 | 6.26E-01        | 3.60E-02        |
| PMM3          |                 |                 |                 | 3.81E-01        |
| Category B    | PMM1            | PMM2            | PMM3            | PMM4            |
| PWM           | <b>9.77E-04</b> | <b>9.77E-04</b> | <b>9.77E-4</b>  | <b>9.77E-04</b> |
| PMM1          |                 | <b>1.95E-03</b> | <b>2.92E-03</b> | <b>2.92E-03</b> |
| PMM2          |                 |                 | 3.65E-01        | 4.13E-02        |
| PMM3          |                 |                 |                 | 4.65E-01        |
